# Supplementary material for: miR‐26a‐5p alleviates CFA‐induced chronic inflammatory hyperalgesia through Wnt5a/CaMKII/NFAT signaling in mice
Source: PubMed Central journal article supplement (PMC10068476; doi:10.1111/cns.14099), 2023-02-08

Figure 3D

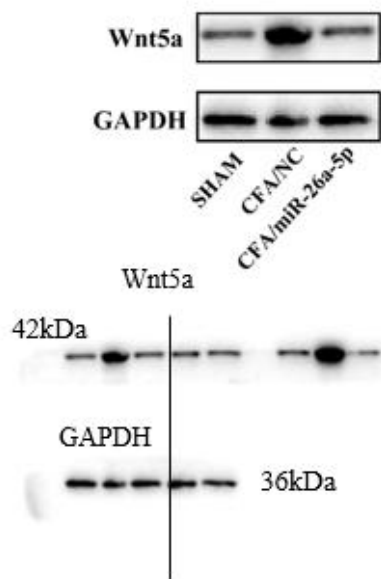

Figure 4A

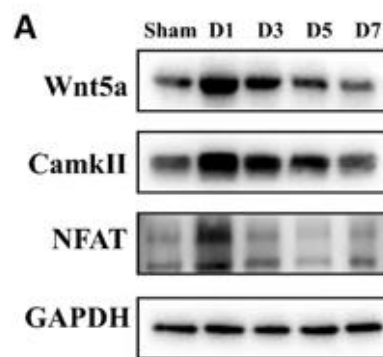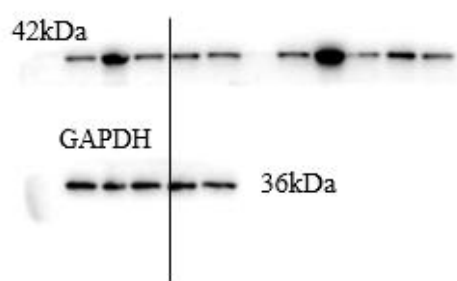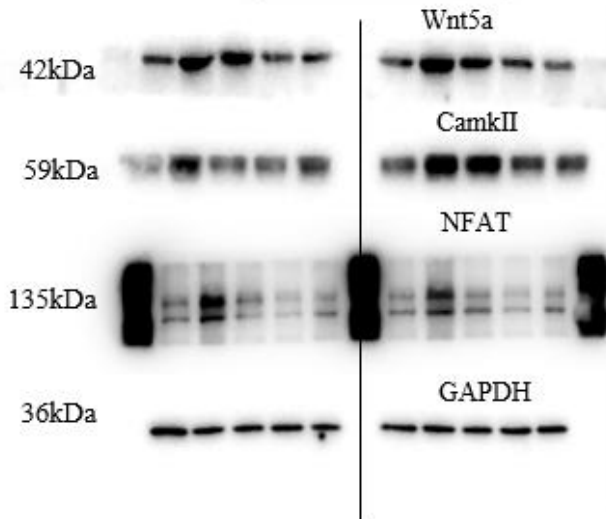

Figure 4F

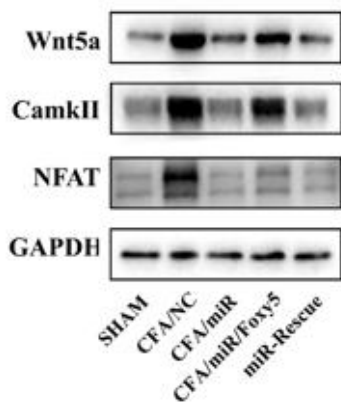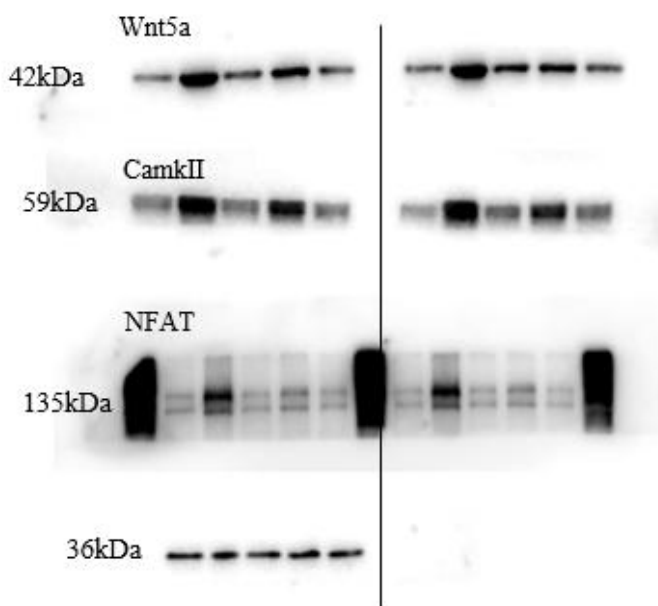

Figure 5B

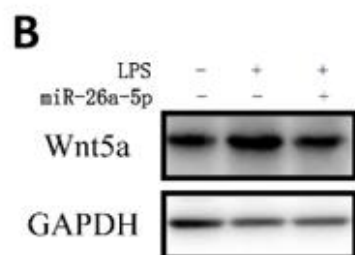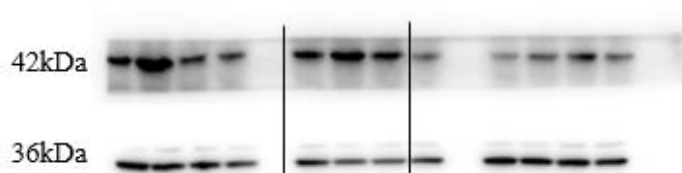

Figure 5F

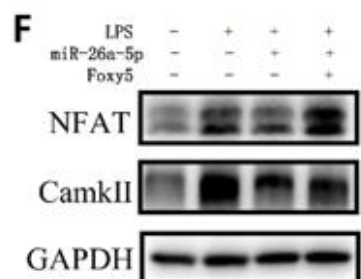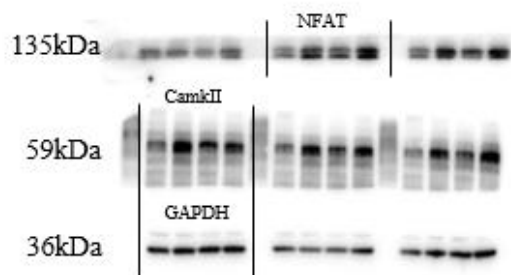

Figure 5G

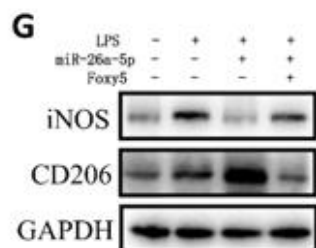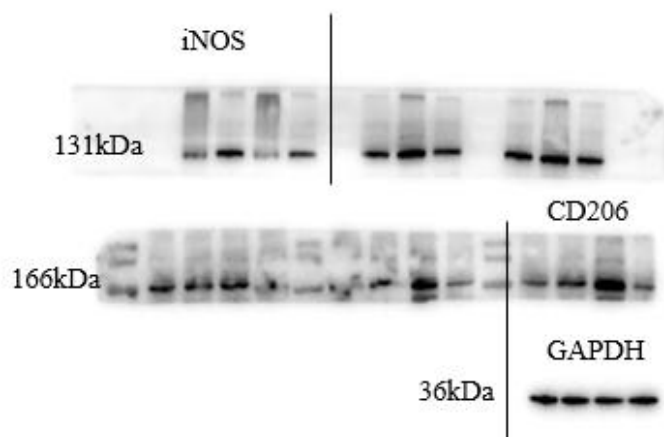

Supplement: CNS-29-1254-s001.pdf [file CNS-29-1254-s001.pdf]
